# Supplementary material
Source: publisher site journal article supplement (https://www.dovepress.com/article/228415)
Supplement: Supplementary file 1 [file get_supplementary_file.php]

# **Supplementary Materials**

## SUPPLEMENTARY TABLES

**Supplementary Table S1.** In-hospital death: Akaike’s Information Criterion.

|                   | <b>Basic Model</b> | <b>Charlson</b> | <b>Elixhauer</b> | <b>Queralt DxS</b> | <b>APRDRG Risk</b> | <b>APRDRG Severity</b> | <b>APRDRG Risk*</b> | <b>APRDRG Severity*</b> | <b>Queralt Dx</b> |
|-------------------|--------------------|-----------------|------------------|--------------------|--------------------|------------------------|---------------------|-------------------------|-------------------|
| All               | 49,403             | 46,729          | 44,551           | 37,696             | 36,778             | 33,694                 | 39,063              | 34,152                  | 30,538            |
| Colon cancer      | 486                | 439             | 406              | 378                | 394                | 330                    | 388                 | 327                     | 327               |
| Pancreatic cancer | 467                | 422             | 406              | 320                | 367                | 334                    | 360                 | 328                     | 289               |
| Lung cancer       | 1,157              | 1,103           | 1,087            | 952                | 1,021              | 945                    | 1,018               | 949                     | 866               |
| Leukemia          | 398                | 396             | 392              | 315                | 349                | 325                    | 365                 | 320                     | 282               |
| AMI               | 1,483              | 1,470           | 1,338            | 1,145              | 939                | 934                    | 976                 | 945                     | 877               |
| Arrhythmia        | 328                | 321             | 320              | 264                | 221                | 218                    | 207                 | 204                     | 222               |
| HF                | 2,668              | 2,653           | 2,562            | 2,259              | 2,193              | 2,034                  | 2,263               | 2,061                   | 1,967             |
| CeVD              | 3,149              | 3,078           | 3,025            | 2,492              | 2,067              | 1,796                  | 2,148               | 1,832                   | 1,766             |
| Pneumonia         | 1,644              | 1,602           | 1,540            | 1,409              | 1,344              | 1,314                  | 1,429               | 1,329                   | 1,257             |
| Influenza         | 487                | 483             | 455              | 418                | 393                | 395                    | 418                 | 391                     | 388               |
| Acute bronchitis  | 522                | 521             | 509              | 489                | 484                | 460                    | 559                 | 470                     | 469               |
| COPD              | 1,291              | 1,276           | 1,216            | 1,101              | 1,134              | 1,104                  | 1,173               | 1,117                   | 995               |
| Resp. failure     | 844                | 806             | 784              | 732                | 786                | 721                    | 823                 | 729                     | 658               |

\* Age not included as covariate in these regression models in order to prevent overfitting.

All models adjusted for age (unless stated otherwise), sex, type of admission, and center.

“Queralt Dx” includes principal diagnosis, pre-existing comorbidities, and in-hospital complications; “Queralt DxS” includes pre-existing comorbidities.

Abbreviations: AMI = acute myocardial infarction; APRDRG = All Patients Refined Diagnosis Related Groups; CeVD = cerebrovascular disease; COPD = chronic obstructive pulmonary disease; HF = heart failure.

**Supplementary Table S2.** In-hospital death: Bayesian Information Criterion.

|                   | <b>Basic Model</b> | <b>Charlson</b> | <b>Elixhauer</b> | <b>Queralt DxS</b> | <b>APRDRG Risk</b> | <b>APRDRG Severity</b> | <b>APRDRG Risk*</b> | <b>APRDRG Severity*</b> | <b>Queralt Dx</b> |
|-------------------|--------------------|-----------------|------------------|--------------------|--------------------|------------------------|---------------------|-------------------------|-------------------|
| All               | 49,592             | 46,926          | 44,749           | 37,895             | 37,007             | 33,924                 | 39,203              | 34,291                  | 30,757            |
| Colon cancer      | 560                | 518             | 484              | 457                | 483                | 419                    | 453                 | 391                     | 416               |
| Pancreatic cancer | 531                | 490             | 475              | 389                | 444                | 412                    | 416                 | 384                     | 367               |
| Lung cancer       | 1,246              | 1,197           | 1,181            | 1,046              | 1,125              | 1,049                  | 1,086               | 1,017                   | 970               |
| Leukemia          | 472                | 473             | 469              | 393                | 435                | 411                    | 418                 | 374                     | 368               |
| AMI               | 1,580              | 1,572           | 1,440            | 1,247              | 1,054              | 1,048                  | 1,054               | 1,023                   | 991               |
| Arrhythmia        | 438                | 436             | 436              | 380                | 349                | 346                    | 283                 | 279                     | 350               |
| HF                | 2,792              | 2,783           | 2,693            | 2,389              | 2,337              | 2,178                  | 2,347               | 2,145                   | 2,110             |
| CeVD              | 3,266              | 3,200           | 3,147            | 2,615              | 2,202              | 1,931                  | 2,227               | 1,912                   | 1,901             |
| Pneumonia         | 1,759              | 1,722           | 1,660            | 1,530              | 1,477              | 1,447                  | 1,508               | 1,408                   | 1,390             |
| Influenza         | 584                | 584             | 556              | 519                | 504                | 507                    | 484                 | 457                     | 499               |
| Acute bronchitis  | 637                | 640             | 629              | 610                | 618                | 593                    | 638                 | 549                     | 602               |
| COPD              | 1,401              | 1,393           | 1,333            | 1,218              | 1,262              | 1,233                  | 1,253               | 1,197                   | 1,124             |
| Resp. failure     | 932                | 899             | 877              | 825                | 888                | 823                    | 883                 | 789                     | 760               |

\* Age not included as covariate in these regression models in order to prevent overfitting.

All models adjusted for age (unless stated otherwise), sex, type of admission, and center.

“Queralt Dx” includes principal diagnosis, pre-existing comorbidities, and in-hospital complications; “Queralt DxS” includes pre-existing comorbidities.

Abbreviations: AMI = acute myocardial infarction; APRDRG = All Patients Refined Diagnosis Related Groups; CeVD = cerebrovascular disease; COPD = chronic obstructive pulmonary disease; HF = heart failure.

**Supplementary Table S3.** In-hospital death: Brier’s score.

|                   | <b>Basic Model</b> | <b>Charlson</b> | <b>Elixhauer</b> | <b>Queralt DxS</b> | <b>APRDRG Risk</b> | <b>APRDRG Severity</b> | <b>APRDRG Risk*</b> | <b>APRDRG Severity*</b> | <b>Queralt Dx</b> |
|-------------------|--------------------|-----------------|------------------|--------------------|--------------------|------------------------|---------------------|-------------------------|-------------------|
| All               | 0.0397             | 0.0423          | 0.0411           | 0.0324             | 0.0322             | 0.0299                 | 0.0335              | 0.0302                  | 0.0271            |
| Colon cancer      | 0.0628             | 0.0578          | 0.0548           | 0.0472             | 0.0507             | 0.0419                 | 0.0515              | 0.0434                  | 0.0417            |
| Pancreatic cancer | 0.1215             | 0.1125          | 0.1078           | 0.0788             | 0.0891             | 0.0814                 | 0.0914              | 0.0836                  | 0.0690            |
| Lung cancer       | 0.1298             | 0.1266          | 0.1245           | 0.1053             | 0.1149             | 0.1046                 | 0.1166              | 0.1072                  | 0.0951            |
| Leukemia          | 0.1278             | 0.1304          | 0.1286           | 0.0944             | 0.1089             | 0.0968                 | 0.1163              | 0.0993                  | 0.0833            |
| AMI               | 0.0643             | 0.0642          | 0.0606           | 0.0514             | 0.0456             | 0.0449                 | 0.0472              | 0.0460                  | 0.0400            |
| Arrhythmia        | 0.0116             | 0.0123          | 0.0123           | 0.0098             | 0.0088             | 0.0084                 | 0.0091              | 0.0087                  | 0.0086            |
| HF                | 0.0706             | 0.0704          | 0.0686           | 0.0606             | 0.0609             | 0.0564                 | 0.0623              | 0.0579                  | 0.0530            |
| CeVD              | 0.1439             | 0.1423          | 0.1393           | 0.1101             | 0.0888             | 0.0747                 | 0.0927              | 0.0770                  | 0.0752            |
| Pneumonia         | 0.0705             | 0.0717          | 0.0692           | 0.0619             | 0.0604             | 0.0596                 | 0.0638              | 0.0604                  | 0.0551            |
| Influenza         | 0.0509             | 0.0516          | 0.0497           | 0.0440             | 0.0414             | 0.0419                 | 0.0441              | 0.0421                  | 0.0396            |
| Acute bronchitis  | 0.0180             | 0.0195          | 0.0193           | 0.0176             | 0.0174             | 0.0168                 | 0.0183              | 0.0172                  | 0.0165            |
| COPD              | 0.0448             | 0.0446          | 0.0434           | 0.0392             | 0.0410             | 0.0405                 | 0.0424              | 0.0413                  | 0.0357            |
| Resp. failure     | 0.1766             | 0.1678          | 0.1619           | 0.1456             | 0.1586             | 0.1428                 | 0.1694              | 0.1488                  | 0.1274            |

\* Age not included as covariate in these regression models in order to prevent overfitting.

All models adjusted for age (unless stated otherwise), sex, type of admission, and center.

“Queralt Dx” includes principal diagnosis, pre-existing comorbidities, and in-hospital complications; “Queralt DxS” includes pre-existing comorbidities.

Abbreviations: AMI = acute myocardial infarction; APRDRG = All Patients Refined Diagnosis Related Groups; CeVD = cerebrovascular disease; COPD = chronic obstructive pulmonary disease; HF = heart failure.

**Supplementary Table S4.** Length of in-hospital stay >14 days: Akaike’s Information Criterion.

|                   | <b>Basic Model</b> | <b>Charlson</b> | <b>Elixhauer</b> | <b>Queralt DxS</b> | <b>APRDRG Risk</b> | <b>APRDRG Severity</b> | <b>APRDRG Risk*</b> | <b>APRDRG Severity*</b> | <b>Queralt Dx</b> |
|-------------------|--------------------|-----------------|------------------|--------------------|--------------------|------------------------|---------------------|-------------------------|-------------------|
| All               | 80,008             | 77,084          | 76,131           | 75,772             | 70,305             | 74,039                 | 71,089              | 75,127                  | 69,762            |
| Colon cancer      | 755                | 751             | 744              | 745                | 649                | 712                    | 644                 | 705                     | 654               |
| Pancreatic cancer | 554                | 545             | 548              | 551                | 537                | 549                    | 530                 | 540                     | 548               |
| Lung cancer       | 987                | 980             | 982              | 981                | 944                | 970                    | 934                 | 959                     | 940               |
| Leukemia          | 563                | 540             | 536              | 564                | 482                | 542                    | 530                 | 602                     | 445               |
| AMI               | 1,827              | 1,798           | 1,739            | 1,700              | 1,551              | 1,592                  | 1,560               | 1,607                   | 1,549             |
| Arrhythmia        | 611                | 596             | 583              | 576                | 563                | 550                    | 559                 | 551                     | 502               |
| HF                | 3,118              | 3,112           | 3,059            | 3,003              | 2,813              | 2,930                  | 2,834               | 2,982                   | 2,744             |
| CeVD              | 2,180              | 2,153           | 2,131            | 2,134              | 2,037              | 2,076                  | 2,106               | 2,176                   | 2,012             |
| Pneumonia         | 1,722              | 1,697           | 1,659            | 1,575              | 1,469              | 1,562                  | 1,484               | 1,579                   | 1,453             |
| Influenza         | 580                | 570             | 573              | 524                | 488                | 517                    | 507                 | 540                     | 476               |
| Acute bronchitis  | 732                | 719             | 705              | 667                | 679                | 696                    | 709                 | 705                     | 643               |
| COPD              | 1,745              | 1,743           | 1,683            | 1,619              | 1,559              | 1,625                  | 1,550               | 1,623                   | 1,475             |
| Resp. failure     | 586                | 586             | 584              | 579                | 558                | 575                    | 547                 | 570                     | 566               |

\* Age not included as covariate in these regression models in order to prevent overfitting.

All models adjusted for age (unless stated otherwise), sex, type of admission, and center.

“Queralt Dx” includes principal diagnosis, pre-existing comorbidities, and in-hospital complications; “Queralt DxS” includes pre-existing comorbidities.

Abbreviations: AMI = acute myocardial infarction; APRDRG = All Patients Refined Diagnosis Related Groups; CeVD = cerebrovascular disease; COPD = chronic obstructive pulmonary disease; HF = heart failure.

**Supplementary Table S5.** Length of in-hospital stay >14 days: Bayesian Information Criterion.

|                   | <b>Basic Model</b> | <b>Charlson</b> | <b>Elixhauer</b> | <b>Queralt DxS</b> | <b>APRDRG Risk</b> | <b>APRDRG Severity</b> | <b>APRDRG Risk*</b> | <b>APRDRG Severity*</b> | <b>Queralt Dx</b> |
|-------------------|--------------------|-----------------|------------------|--------------------|--------------------|------------------------|---------------------|-------------------------|-------------------|
| All               | 80,197             | 77,282          | 76,329           | 75,971             | 70,534             | 74,268                 | 71,229              | 75,267                  | 69,981            |
| Colon cancer      | 829                | 830             | 822              | 824                | 738                | 801                    | 708                 | 769                     | 743               |
| Pancreatic cancer | 619                | 614             | 617              | 620                | 615                | 627                    | 586                 | 597                     | 626               |
| Lung cancer       | 1,075              | 1,074           | 1,076            | 1,075              | 1,049              | 1,074                  | 1,002               | 1,027                   | 1,044             |
| Leukemia          | 637                | 617             | 614              | 642                | 568                | 628                    | 583                 | 656                     | 531               |
| AMI               | 1,923              | 1,900           | 1,841            | 1,802              | 1,665              | 1,706                  | 1,638               | 1,685                   | 1,663             |
| Arrhythmia        | 722                | 711             | 698              | 692                | 692                | 679                    | 635                 | 627                     | 630               |
| HF                | 3,242              | 3,242           | 3,189            | 3,133              | 2,956              | 3,073                  | 2,919               | 3,066                   | 2,887             |
| CeVD              | 2,296              | 2,276           | 2,253            | 2,257              | 2,171              | 2,211                  | 2,186               | 2,256                   | 2,147             |
| Pneumonia         | 1,837              | 1,817           | 1,780            | 1,696              | 1,602              | 1,695                  | 1,562               | 1,658                   | 1,586             |
| Influenza         | 676                | 671             | 674              | 625                | 600                | 628                    | 573                 | 606                     | 587               |
| Acute bronchitis  | 847                | 838             | 825              | 788                | 812                | 829                    | 787                 | 784                     | 776               |
| COPD              | 1,856              | 1,859           | 1,799            | 1,736              | 1,688              | 1,754                  | 1,630               | 1,703                   | 1,604             |
| Resp. failure     | 675                | 679             | 677              | 671                | 660                | 677                    | 608                 | 630                     | 669               |

\* Age not included as covariate in these regression models in order to prevent overfitting.

All models adjusted for age (unless stated otherwise), sex, type of admission, and center.

“Queralt Dx” includes principal diagnosis, pre-existing comorbidities, and in-hospital complications; “Queralt DxS” includes pre-existing comorbidities.

Abbreviations: AMI = acute myocardial infarction; APRDRG = All Patients Refined Diagnosis Related Groups; CeVD = cerebrovascular disease; COPD = chronic obstructive pulmonary disease; HF = heart failure.

**Supplementary Table S6.** Length of in-hospital stay >14 days: Brier’s score.

|                   | <b>Basic Model</b> | <b>Charlson</b> | <b>Elixhauer</b> | <b>Queralt DxS</b> | <b>APRDRG Risk</b> | <b>APRDRG Severity</b> | <b>APRDRG Risk*</b> | <b>APRDRG Severity*</b> | <b>Queralt Dx</b> |
|-------------------|--------------------|-----------------|------------------|--------------------|--------------------|------------------------|---------------------|-------------------------|-------------------|
| All               | 0.0679             | 0.0724          | 0.0718           | 0.0658             | 0.0615             | 0.0639                 | 0.0620              | 0.0647                  | 0.0609            |
| Colon cancer      | 0.1036             | 0.1055          | 0.1046           | 0.1022             | 0.0891             | 0.0970                 | 0.0900              | 0.0974                  | 0.0887            |
| Pancreatic cancer | 0.1522             | 0.1520          | 0.1524           | 0.1513             | 0.1448             | 0.1489                 | 0.1455              | 0.1493                  | 0.1495            |
| Lung cancer       | 0.1032             | 0.1039          | 0.1044           | 0.1028             | 0.0998             | 0.1020                 | 0.1002              | 0.1023                  | 0.0993            |
| Leukemia          | 0.2023             | 0.1969          | 0.1957           | 0.2017             | 0.1606             | 0.1887                 | 0.1894              | 0.2257                  | 0.1426            |
| AMI               | 0.0850             | 0.0843          | 0.0816           | 0.0804             | 0.0742             | 0.0764                 | 0.0748              | 0.0775                  | 0.0736            |
| Arrhythmia        | 0.0274             | 0.0286          | 0.0283           | 0.0274             | 0.0266             | 0.0260                 | 0.0269              | 0.0264                  | 0.0241            |
| HF                | 0.0866             | 0.0866          | 0.0856           | 0.0848             | 0.0791             | 0.0819                 | 0.0802              | 0.0840                  | 0.0767            |
| CeVD              | 0.0906             | 0.0905          | 0.0898           | 0.0895             | 0.0852             | 0.0862                 | 0.0896              | 0.0917                  | 0.0848            |
| Pneumonia         | 0.0721             | 0.0739          | 0.0726           | 0.0681             | 0.0632             | 0.0673                 | 0.0642              | 0.0684                  | 0.0620            |
| Influenza         | 0.0616             | 0.0623          | 0.0619           | 0.0564             | 0.0519             | 0.0546                 | 0.0550              | 0.0589                  | 0.0501            |
| Acute bronchitis  | 0.0251             | 0.0269          | 0.0266           | 0.0241             | 0.0243             | 0.0244                 | 0.0248              | 0.0246                  | 0.0234            |
| COPD              | 0.0657             | 0.0657          | 0.0641           | 0.0626             | 0.0586             | 0.0619                 | 0.0589              | 0.0626                  | 0.0562            |
| Resp. failure     | 0.1046             | 0.1058          | 0.1056           | 0.1033             | 0.0987             | 0.1016                 | 0.0999              | 0.1039                  | 0.1009            |

\* Age not included as covariate in these regression models in order to prevent overfitting.

All models adjusted for age (unless stated otherwise), sex, type of admission, and center.

“Queralt Dx” includes principal diagnosis, pre-existing comorbidities, and in-hospital complications; “Queralt DxS” includes pre-existing comorbidities.

Abbreviations: AMI = acute myocardial infarction; APRDRG = All Patients Refined Diagnosis Related Groups; CeVD = cerebrovascular disease; COPD = chronic obstructive pulmonary disease; HF = heart failure.



**Supplementary Table S7.** ICU stay: Akaike’s Information Criterion.

|                   | <b>Basic Model</b> | <b>Charlson</b> | <b>Elixhauer</b> | <b>Queralt DxS</b> | <b>APRDRG Risk</b> | <b>APRDRG Severity</b> | <b>APRDRG Risk*</b> | <b>APRDRG Severity*</b> | <b>Queralt Dx</b> |
|-------------------|--------------------|-----------------|------------------|--------------------|--------------------|------------------------|---------------------|-------------------------|-------------------|
| All               | 59,631             | 56,670          | 56,097           | 55,348             | 52,203             | 52,415                 | 53,970              | 55,151                  | 50,435            |
| Colon cancer      | 333                | 327             | 326              | 326                | 308                | 306                    | 304                 | 303                     | 309               |
| Pancreatic cancer | 136                | 128             | 131              | 136                | 119                | 116                    | 127                 | 123                     | 126               |
| Lung cancer       | 534                | 528             | 527              | 536                | 491                | 508                    | 488                 | 509                     | 496               |
| Leukemia          | 194                | 192             | 189              | 162                | 161                | 149                    | 164                 | 165                     | 141               |
| AMI               | 1,962              | 1,961           | 1,960            | 1,959              | 1,921              | 1,923                  | 1,928               | 1,926                   | 1,887             |
| Arrhythmia        | 731                | 681             | 676              | 656                | 608                | 581                    | 611                 | 595                     | 568               |
| HF                | 1,150              | 1,147           | 1,142            | 1,096              | 985                | 1,009                  | 1,064               | 1,114                   | 966               |
| CeVD              | 2,349              | 2,334           | 2,328            | 2,198              | 1,978              | 1,932                  | 2,149               | 2,135                   | 1,817             |
| Pneumonia         | 1,166              | 1,158           | 1,094            | 976                | 803                | 854                    | 872                 | 971                     | 757               |
| Influenza         | 441                | 441             | 432              | 361                | 308                | 318                    | 345                 | 382                     | 296               |
| Acute bronchitis  | 529                | 511             | 487              | 473                | 507                | 507                    | 564                 | 572                     | 470               |
| COPD              | 620                | 621             | 603              | 553                | 472                | 521                    | 474                 | 539                     | 438               |
| Resp. failure     | 581                | 567             | 572              | 534                | 434                | 486                    | 449                 | 538                     | 480               |

\* Age not included as covariate in these regression models in order to prevent overfitting.

All models adjusted for age (unless stated otherwise), sex, type of admission, and center.

“Queralt Dx” includes principal diagnosis, pre-existing comorbidities, and in-hospital complications; “Queralt DxS” includes pre-existing comorbidities.

Abbreviations: AMI = acute myocardial infarction; APRDRG = All Patients Refined Diagnosis Related Groups; CeVD = cerebrovascular disease; COPD = chronic obstructive pulmonary disease; HF = heart failure; ICU = intensive care unit.

**Supplementary Table S8.** ICU stay: Bayesian Information Criterion.

|                   | <b>Basic Model</b> | <b>Charlson</b> | <b>Elixhauer</b> | <b>Queralt DxS</b> | <b>APRDRG Risk</b> | <b>APRDRG Severity</b> | <b>APRDRG Risk*</b> | <b>APRDRG Severity*</b> | <b>Queralt Dx</b> |
|-------------------|--------------------|-----------------|------------------|--------------------|--------------------|------------------------|---------------------|-------------------------|-------------------|
| All               | 59,820             | 56,868          | 56,294           | 55,548             | 52,432             | 52,644                 | 54,110              | 55,291                  | 50,654            |
| Colon cancer      | 407                | 406             | 404              | 405                | 397                | 395                    | 368                 | 367                     | 398               |
| Pancreatic cancer | 200                | 197             | 200              | 205                | 197                | 194                    | 183                 | 179                     | 203               |
| Lung cancer       | 623                | 621             | 621              | 630                | 596                | 612                    | 556                 | 577                     | 601               |
| Leukemia          | 268                | 269             | 267              | 240                | 247                | 235                    | 218                 | 218                     | 227               |
| AMI               | 2,059              | 2,063           | 2,062            | 2,061              | 2,035              | 2,037                  | 2,006               | 2,004                   | 2,002             |
| Arrhythmia        | 842                | 796             | 792              | 772                | 736                | 710                    | 687                 | 671                     | 696               |
| HF                | 1,274              | 1,277           | 1,273            | 1,226              | 1,128              | 1,152                  | 1,148               | 1,199                   | 1,110             |
| CeVD              | 2,466              | 2,456           | 2,451            | 2,320              | 2,113              | 2,066                  | 2,228               | 2,215                   | 1,952             |
| Pneumonia         | 1,281              | 1,279           | 1,215            | 1,097              | 936                | 987                    | 950                 | 1,050                   | 890               |
| Influenza         | 537                | 542             | 533              | 462                | 420                | 430                    | 411                 | 448                     | 408               |
| Acute bronchitis  | 644                | 630             | 606              | 594                | 640                | 640                    | 643                 | 651                     | 603               |
| COPD              | 730                | 738             | 719              | 669                | 601                | 650                    | 553                 | 619                     | 567               |
| Resp. failure     | 669                | 660             | 664              | 627                | 537                | 589                    | 510                 | 598                     | 582               |

\* Age not included as covariate in these regression models in order to prevent overfitting.

All models adjusted for age (unless stated otherwise), sex, type of admission, and center.

“Queralt Dx” includes principal diagnosis, pre-existing comorbidities, and in-hospital complications; “Queralt DxS” includes pre-existing comorbidities.

Abbreviations: AMI = acute myocardial infarction; APRDRG = All Patients Refined Diagnosis Related Groups; CeVD = cerebrovascular disease; COPD = chronic obstructive pulmonary disease; HF = heart failure; ICU = intensive care unit.

**Supplementary Table S9.** ICU stay: Brier’s score.

|                   | <b>Basic Model</b> | <b>Charlson</b> | <b>Elixhauer</b> | <b>Queralt DxS</b> | <b>APRDRG Risk</b> | <b>APRDRG Severity</b> | <b>APRDRG Risk*</b> | <b>APRDRG Severity*</b> | <b>Queralt Dx</b> |
|-------------------|--------------------|-----------------|------------------|--------------------|--------------------|------------------------|---------------------|-------------------------|-------------------|
| All               | 0.0484             | 0.0507          | 0.0505           | 0.0457             | 0.0439             | 0.0440                 | 0.0447              | 0.0453                  | 0.0424            |
| Colon cancer      | 0.0399             | 0.0398          | 0.0395           | 0.0384             | 0.0372             | 0.0370                 | 0.0375              | 0.0378                  | 0.0384            |
| Pancreatic cancer | 0.0257             | 0.0221          | 0.0236           | 0.0242             | 0.0213             | 0.0197                 | 0.0259              | 0.0232                  | 0.0215            |
| Lung cancer       | 0.0503             | 0.0498          | 0.0497           | 0.0503             | 0.0467             | 0.0469                 | 0.0484              | 0.0489                  | 0.0468            |
| Leukemia          | 0.0501             | 0.0510          | 0.0507           | 0.0376             | 0.0377             | 0.0337                 | 0.0421              | 0.0406                  | 0.0303            |
| AMI               | 0.0941             | 0.0942          | 0.0942           | 0.0941             | 0.0934             | 0.0930                 | 0.0943              | 0.0936                  | 0.0916            |
| Arrhythmia        | 0.0361             | 0.0366          | 0.0366           | 0.0332             | 0.0307             | 0.0301                 | 0.0316              | 0.0312                  | 0.0291            |
| HF                | 0.0265             | 0.0263          | 0.0262           | 0.0256             | 0.0240             | 0.0246                 | 0.0254              | 0.0264                  | 0.0240            |
| CeVD              | 0.1027             | 0.1030          | 0.1029           | 0.0971             | 0.0869             | 0.0841                 | 0.0967              | 0.0955                  | 0.0785            |
| Pneumonia         | 0.0458             | 0.0472          | 0.0451           | 0.0394             | 0.0343             | 0.0357                 | 0.0372              | 0.0408                  | 0.0298            |
| Influenza         | 0.0465             | 0.0473          | 0.0459           | 0.0383             | 0.0297             | 0.0303                 | 0.0347              | 0.0395                  | 0.0305            |
| Acute bronchitis  | 0.0192             | 0.0203          | 0.0200           | 0.0173             | 0.0190             | 0.0190                 | 0.0204              | 0.0203                  | 0.0172            |
| COPD              | 0.0188             | 0.0188          | 0.0186           | 0.0173             | 0.0149             | 0.0173                 | 0.0154              | 0.0179                  | 0.0139            |
| Resp. failure     | 0.1090             | 0.1073          | 0.1080           | 0.0959             | 0.0766             | 0.0855                 | 0.0808              | 0.0980                  | 0.0834            |

\* Age not included as covariate in these regression models in order to prevent overfitting.

All models adjusted for age (unless stated otherwise), sex, type of admission, and center.

“Queralt Dx” includes principal diagnosis, pre-existing comorbidities, and in-hospital complications; “Queralt DxS” includes pre-existing comorbidities.

Abbreviations: AMI = acute myocardial infarction; APRDRG = All Patients Refined Diagnosis Related Groups; CeVD = cerebrovascular disease; COPD = chronic obstructive pulmonary disease; HF = heart failure; ICU = intensive care unit.

**Supplementary Table S10.** Subgroup analyses by age and type of hospitalization, and sensitivity analysis excluding delivery-related hospitalizations.

|                      | Basic        | Charlson     | Elixhauser   | Queralt<br>DxS | Queralt<br>Dx | APR-DRG<br>Risk | APR-DRG<br>severity |
|----------------------|--------------|--------------|--------------|----------------|---------------|-----------------|---------------------|
| 0 – 29 years         | 0.764        | 0.785        | 0.820        | 0.937          | 0.985         | 0.964           | 0.951               |
| 60+ years            | 0.679        | 0.726        | 0.773        | 0.856          | 0.925         | 0.896           | 0.873               |
| 60+, Unplanned       | 0.592        | 0.658        | 0.717        | 0.817          | 0.898         | 0.867           | 0.840               |
| 60+, Planned         | 0.656        | 0.776        | 0.838        | 0.896          | 0.973         | 0.934           | 0.913               |
| Excluding deliveries | 0.753        | 0.785        | 0.822        | 0.897          | 0.944         | 0.923           | 0.904               |
| <b>Overall</b>       | <b>0.770</b> | <b>0.800</b> | <b>0.834</b> | <b>0.905</b>   | <b>0.949</b>  | <b>0.928</b>    | <b>0.910</b>        |

Results presented as AUC. All models adjusted for age, sex, type of admission, and center.

“Queralt Dx” includes principal diagnosis, pre-existing comorbidities, and in-hospital complications; “Queralt DxS” includes pre-existing comorbidities.

Abbreviations: APR-DRG = All Patients Refined Diagnosis Related Groups; AUC = area under the curve
